# Supplementary material
Source: PubMed Central journal article supplement (PMC4812432)
Supplement: NIHMS770398-supplement-Supplemental.pdf [file NIHMS770398-supplement-Supplemental.pdf]

Supporting Information for:

**Probing Structural Dynamics and Topology of the KCNE1 Membrane Protein in Lipid Bilayers via Site-directed Spin Labeling and EPR Spectroscopy**

*Indra D. Sahu,<sup>1</sup> Andrew Craig,<sup>1</sup> Megan M. Dunagan,<sup>1</sup> Kaylee R. Troxel,<sup>1</sup> Rongfu Zhang,<sup>1</sup> Andrew Meiburg,<sup>1</sup> Corrinne Harmon,<sup>1</sup> Robert M. McCarrick,<sup>1</sup> Brett M. Kroncke,<sup>2</sup> Charles R. Sanders,<sup>2</sup> and Gary A. Lorigan<sup>1\*</sup>*

<sup>1</sup>Department of Chemistry and Biochemistry, Miami University, Oxford, Ohio 45056

<sup>2</sup>Department of Biochemistry and Center for Structural Biology, Vanderbilt University, Nashville, Tennessee 37232

**Contents:**

**Figure S1**

**Figure S2**

**Table S1**

Figure S1: CW-EPR spectral simulation of KCNE1 mutants in liposomes using Multicomponent LabVIEW program. The mutants V50C and I66C are along the transmembrane domain, F12C is along N-terminus and D76C is along C-terminus of KCNE1.

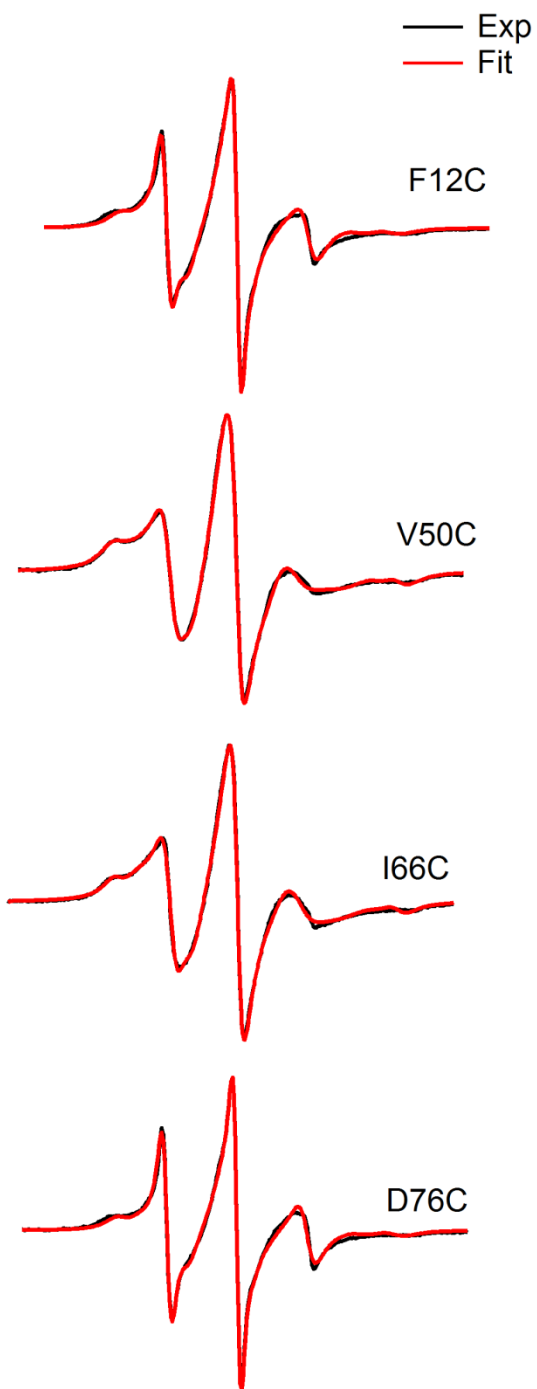

Figure S2: CW-EPR spectra on KCNE1 mutants in 7.5% LMPG micelles (black) and POPC/POPG liposomes (red).

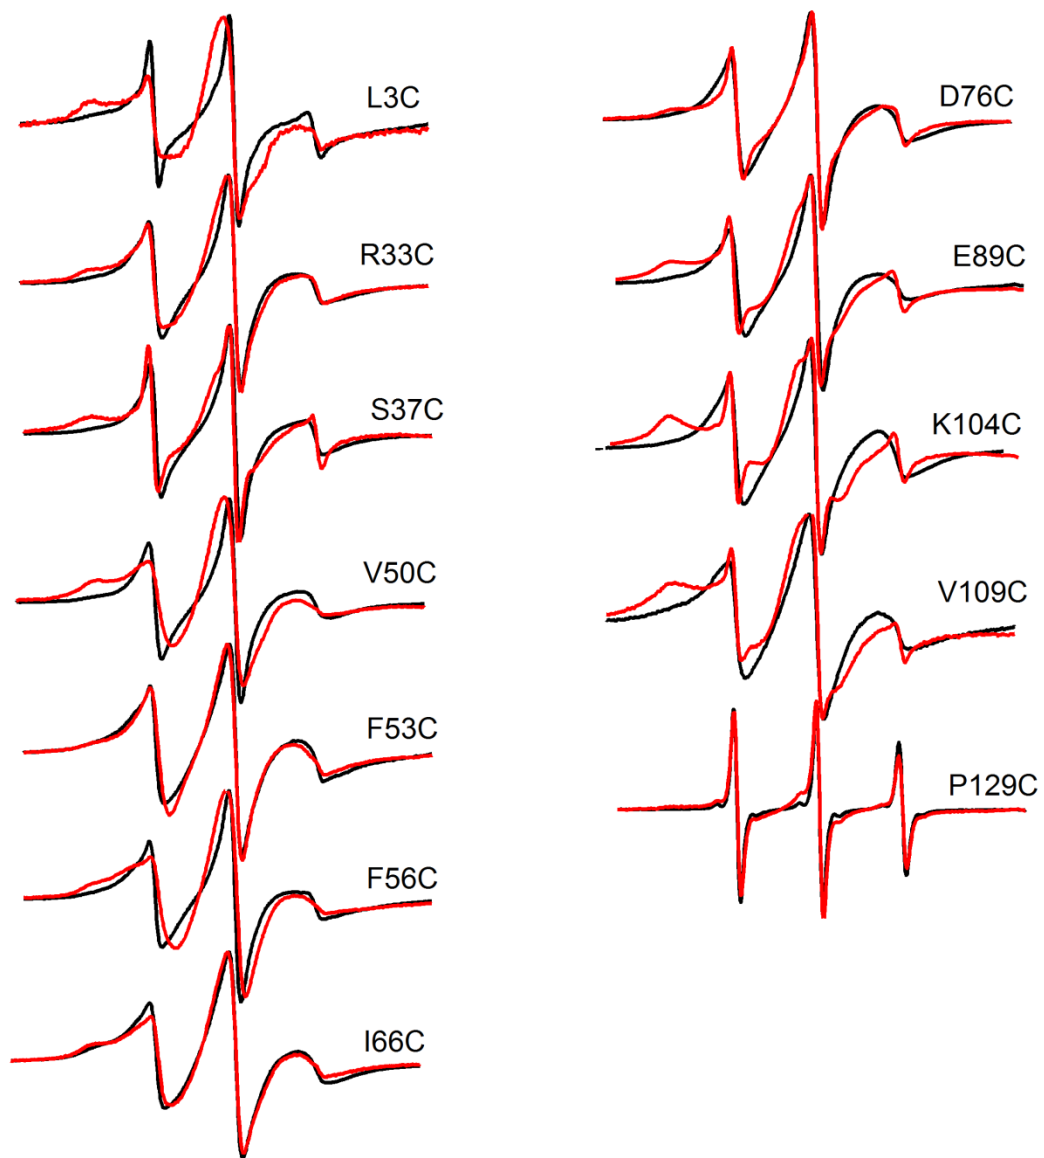

Table S1: Rotational Correlation times and relative population of two spectral components of EPR spectra (Figure S1) obtained from the best fit spectral simulation.

| <b>Mutants</b> |       | <b>Rotational Correlation Time<br/>(ns)</b> | <b>Relative Population<br/>(%)</b> |
|----------------|-------|---------------------------------------------|------------------------------------|
| <b>F12C</b>    | site1 | 0.8                                         | 55                                 |
|                | site2 | 8.2                                         | 45                                 |
| <b>V50C</b>    | site1 | 1.2                                         | 74                                 |
|                | sute2 | 13.7                                        | 26                                 |
| <b>I66C</b>    | site1 | 1.1                                         | 76                                 |
|                | site2 | 16.1                                        | 24                                 |
| <b>D76C</b>    | site1 | 0.8                                         | 55                                 |
|                | site2 | 8.2                                         | 45                                 |
